# Supplementary material
Source: publisher figshare collection journal article supplement (https://tandf.figshare.com/ndownloader/files/20153702)
Supplement: Supplementary file 1 [file 20153702]

## **Synthesis of IM-1-2**

ATP (0.5 g) dissolved in 50 mL methanol was mixed well in 150 mL aqueous NaOH solution (pH 13) for half an hour and left to stand overnight. IM-1-2 and IM-1-4 were triply extracted (3x50 mL) into dichloromethane. Combined organic phases were dried on anhydrous sodium sulfate, decanted and evaporated under nitrogen atmosphere to dryness. The residue was dissolved in methanol, and the components in the mixture were isolated by using thin layer chromatography (stationary phase: silica gel GF254; mobile phase: ACN/water, 1/1,v/v). The degradation products IM-1-2 and IM-1-4 were separated on a thin layer plate, and the isolated compounds were purified separately by TLC, purities were controlled by GC and compounds identified by 1H-NMR, FT-IR, GC- positive chemical ionization (PCI-MS) and electron impact ionization mass spectrometry (EI-MS). IC-O remained in the aqueous layer. IM-1-2 was the main product, and IM-1-4 was obtained in low and varying yields (1-2%).
